# Supplementary material
Source: PubMed Central journal article supplement (PMC4707457)
Supplement: supp_tpc.15.00834_TPC2015-00834-RAR1_Supplemental_Data.pdf [file supp_tpc.15.00834_TPC2015-00834-RAR1_Supplemental_Data.pdf]

## Supplemental Figures and Table

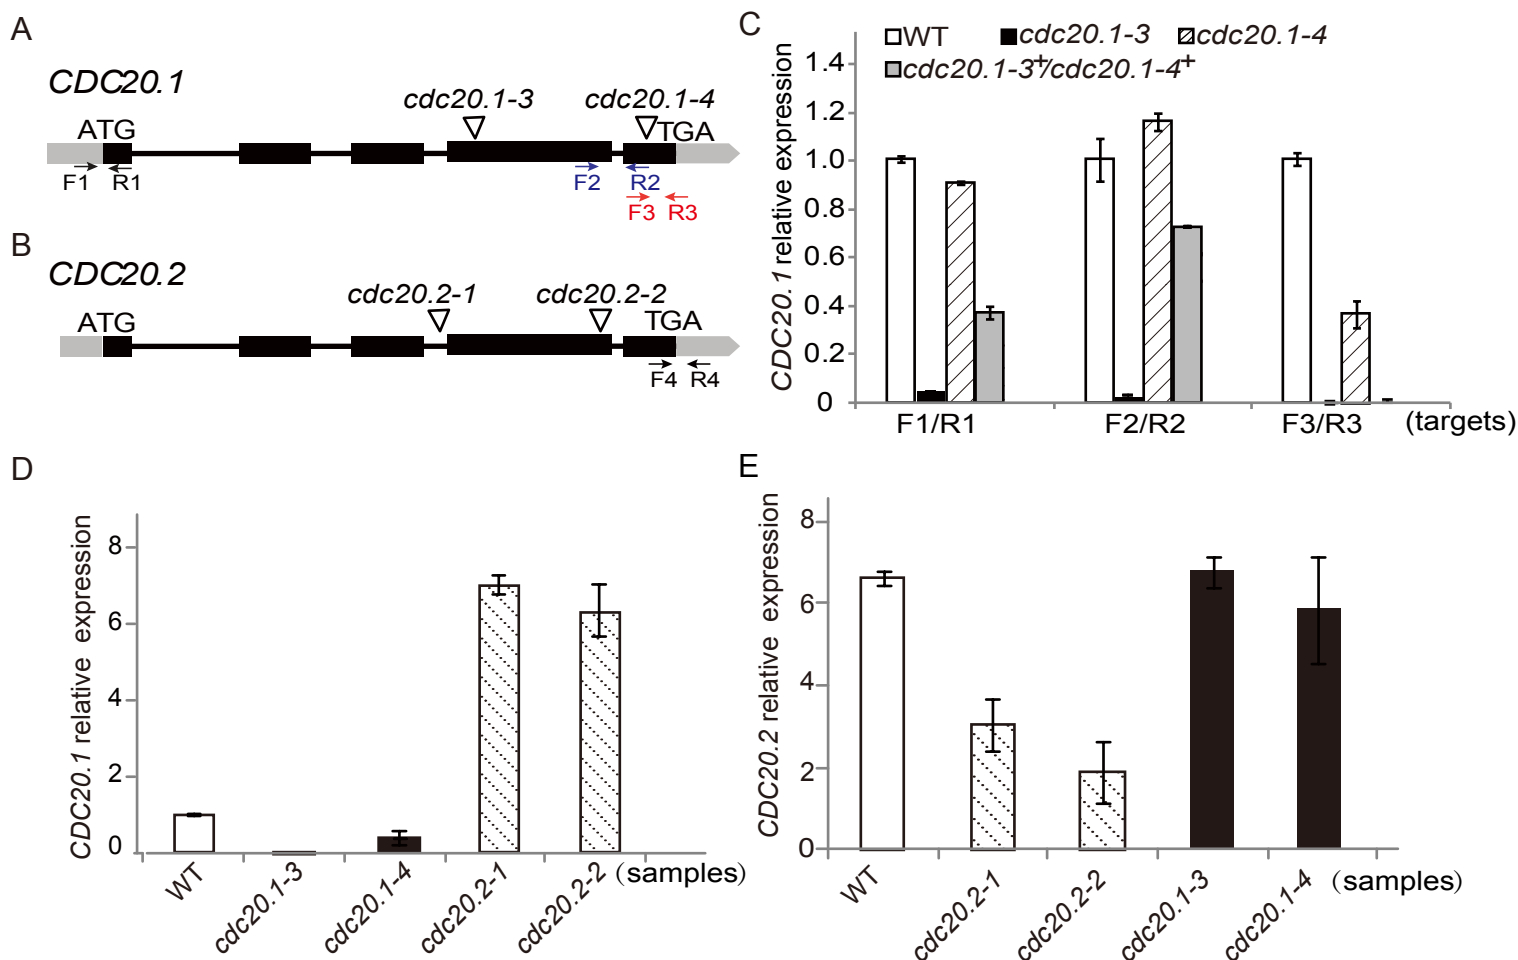

**Supplemental Figure 1.** Schematic Representation and Examination of *CDC20.1* Expression in Different Mutant Alleles.

**(A)** Schematic representation of Arabidopsis *CDC20.1* with T-DNA insertions (inverted triangles) in *cdc20.1-3* and *cdc20.1-4*. The positions of the primers used for RT-qPCR are indicated.

**(B)** Schematic representation of *CDC20.2* with T-DNA insertions in *cdc20.2-1* and *cdc20.2-2* alleles. Exons are shown as boxes (gray: UTR, black: CDS); and arrows indicate primer positions.

**(C)** Real-time PCR amplification of the truncated transcripts from *CDC20.1* loci in T-DNA insertional mutant alleles using different primers as shown in **(A)**.

**(D)** Real-time PCR amplification of *CDC20.1* in WT and T-DNA insertion mutant alleles of *cdc20.1-3*, *cdc20.1-4*, *cdc20.2-1* and *cdc20.2-2* using primers F3/R3 indicated in **(A)**.

**(E)** Real-time PCR amplification of *CDC20.2* in WT and T-DNA insertional mutant alleles of *cdc20.2-1*, *cdc20.2-2*, *cdc20.1-3* and *cdc20.1-4* using primers F4/R4 as shown in **(B)**.

*EF1α* was used as the internal control **(C-E)**. The experiment was conducted in three technical replicates and error bars indicate SD.

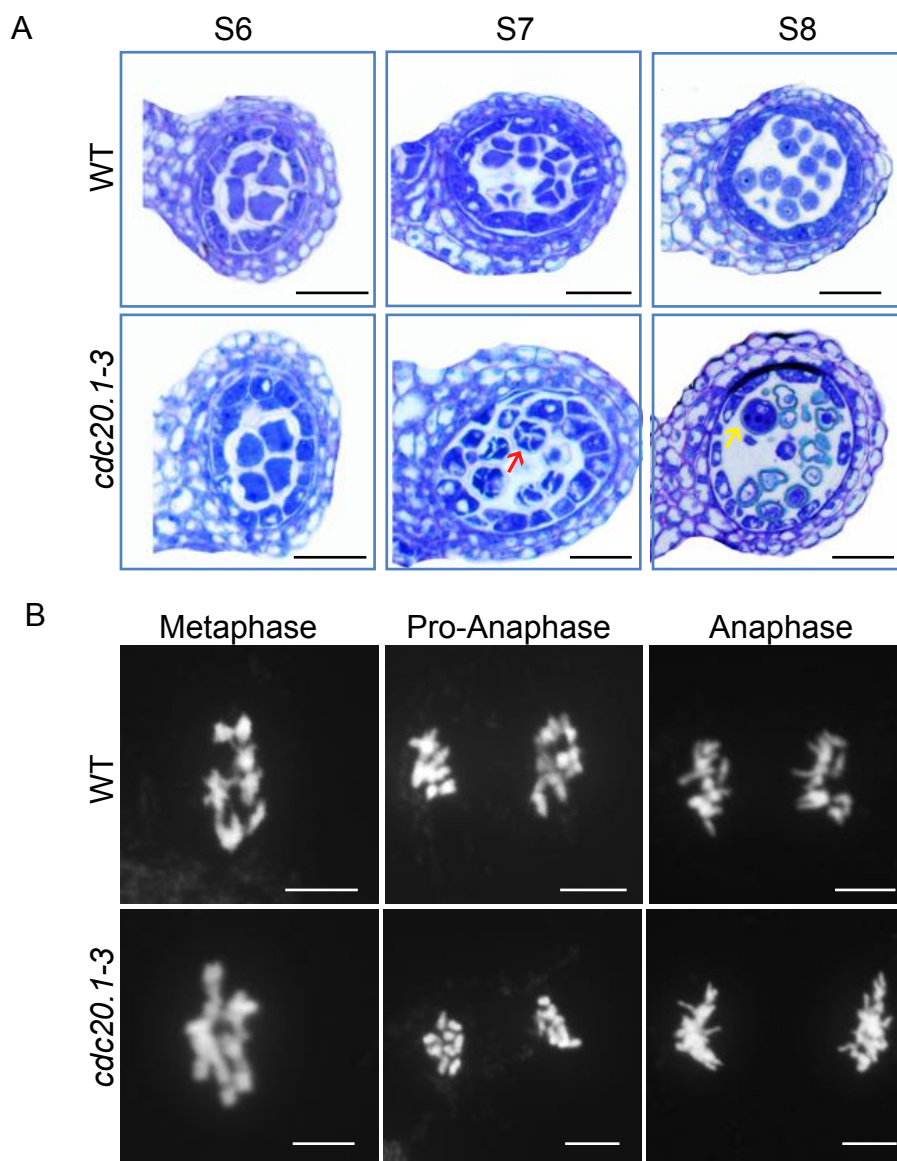

**Supplemental Figure 2.** Mitosis is Normal in *cdc20.1-3*.

**(A)** Semi-thin section of anthers at stage 6 (S6), stage 7 (S7) and stage 8 (S8) in WT (top) and *cdc20.1-3* (bottom). The *cdc20.1-3* anthers form polyads (red arrow) with more than four microspores and different sizes of pollen grain (yellow arrow).

Bars=10  $\mu$ m.

**(B)** Mitotic chromosome phenotypes in WT (top) and *cdc20.1-3* (bottom). Bars=5  $\mu$ m.

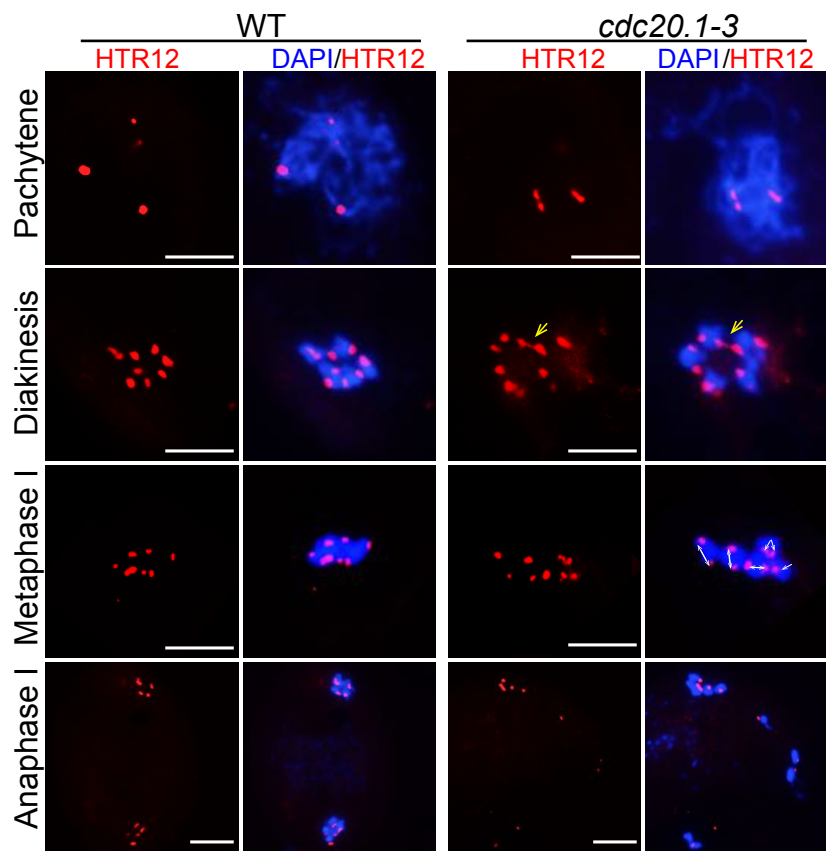

**Supplemental Figure 3.** Localization of HTR12 in WT and *cdc20.1-3*.

Immunolocalization of HTR12 (red) on DAPI stained chromosomes (blue) of WT and *cdc20.1-3* at diakinesis, metaphase I and Anaphase I Bivalents in *cdc20.1-3* associate at diakinesis (yellow arrows) and misorient (white double arrows) at metaphase I.

Bars=5  $\mu$ m.

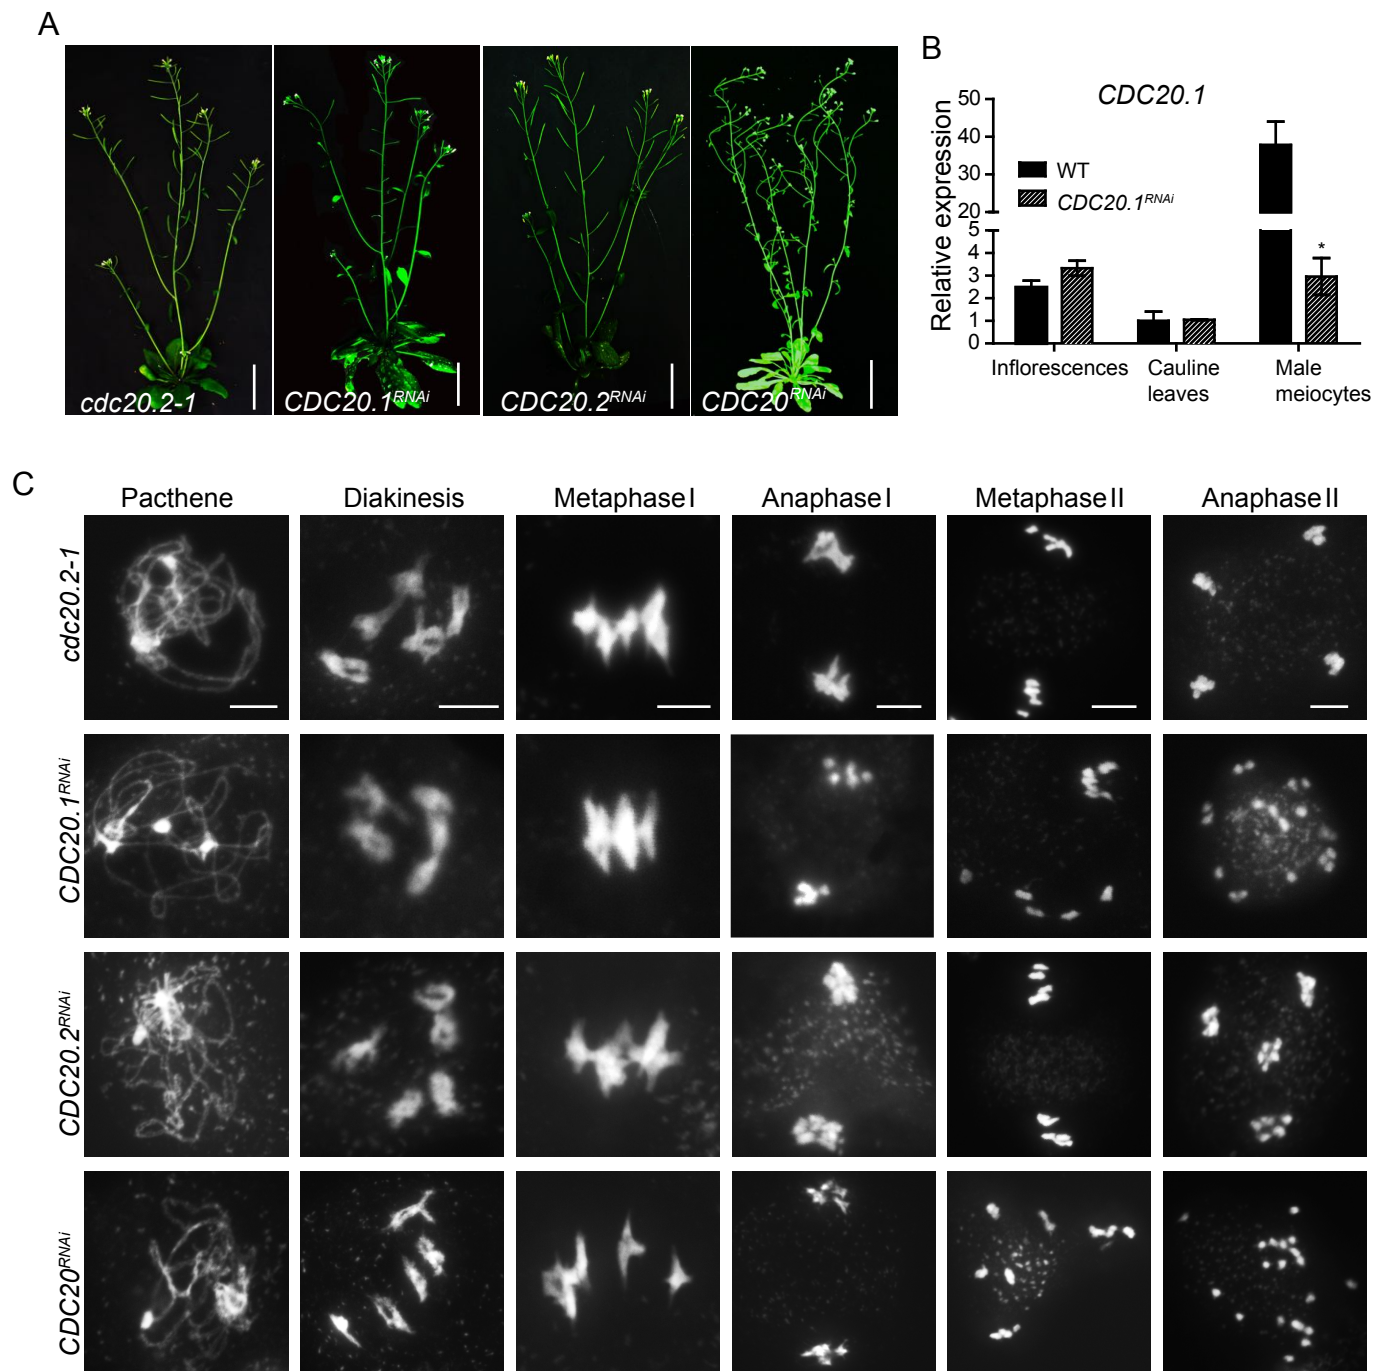

**Supplemental Figure 4. *CDC20.2* is Dispensable for Vegetative and Reproductive Development.**

(A) Phenotypes of *cdc20.2-1*, *ProDMC1:CDC20.1<sup>RNAi</sup>*, *ProDMC1:CDC20.1<sup>RNAi</sup>* and *ProDMC1:CDC20<sup>RNAi</sup>* transgenic plant. Bars=5 cm.

(B) Expression of *CDC20.1* in WT and *ProDMC1:CDC20.1<sup>RNAi</sup>*.

(C) Meiotic chromosome phenotypes of *cdc20.2-1*, *ProDMC1:CDC20.1<sup>RNAi</sup>*, *ProDMC1:CDC20.2<sup>RNAi</sup>* and *ProDMC1:CDC20<sup>RNAi</sup>* at different stages. Bars=5  $\mu$ m.

**Supplemental Table 1.** List of Primers Used in This Study

| Purpose                 | Primer name            | Primer sequence (5' to 3')                  |
|-------------------------|------------------------|---------------------------------------------|
| CDC20.1.3<br>Genotyping | CS369798F              | GATTTAGTTGTTTTCTTTACC                       |
|                         | CS369798R              | CTGAAGTCCAGCTGTGGGAT                        |
|                         | pAC161                 | GGGCTACACTGAATTGGT                          |
| CDC20.1.4<br>Genotyping | CS369975F              | ATGCAAGCAAATAAGTTTGACT                      |
|                         | CS369975R              | GGTAAAGGAAAACAACCTAAATC                     |
|                         | PADIS1                 | GGGCTACACTGAATTGGT                          |
| CDC20.2.1<br>Genotyping | SALK_136710F           | TGAATGACCTCAAAGACTCA                        |
|                         | SALK_136710R           | GATGTGTTTCTCATATTTCT                        |
|                         | SALK -LBb1.3           | ATTTTGCCGATTTTCGGAAC                        |
| CDC20.2.2<br>Genotyping | SALK_114279F           | AGAAATATGAGAAACACATC                        |
|                         | SALK_114279R           | GACCCATATCATTGATGAATC                       |
|                         | SALK -LBb1.3           | ATTTTGCCGATTTTCGGAAC                        |
| qRT-PCR<br>(CDC20.1)    | CDC20.1F1              | ACCCAATCTACTCTCGATTC                        |
|                         | CDC20.1R1              | AGCCTGCGTCTTGTAGTGAG                        |
|                         | CDC20.1F2              | CGGGTTTACACAGAATCAGCTC                      |
|                         | CDC20.1R2              | ATTCCAGAACCTCAGAGTCTCA                      |
|                         | CDC20.1F3              | TGAGACTCTGAGGTTCTGGAAT                      |
| qRT-PCR<br>(CDC20.2)    | CDC20.1R3              | GCAAATAAGTTTGACTCA                          |
|                         | CDC20.2F4              | TGAGACTCTGAGGTTCTGGAAT                      |
| qRT-PCR (EF1 $\alpha$ ) | CDC20.2R4              | GCAAATAAGTTTGACTCA                          |
|                         | EF1 $\alpha$ -F        | GGTGGTATTGACAAGCGTG                         |
| DMC1::CDC20.1 -<br>RNAi | EF1 $\alpha$ -R        | GATTTTCATCGTACCTAGCC                        |
|                         | CDC20.1(Nco I)1st-F    | CATGCCATACCCAATCTACTCTCGAT TC               |
|                         | CDC20.1(Spe I)1st-R    | GGACTAGTAGCCTGCGTCTTGTAGT GAG               |
|                         | CDC20.1(Xba I)2nd-F    | GGTCTAGAACCCAATCTACTCTCGA TTC               |
| DMC1::CDC20.2 -<br>RNAi | CDC20.1(Sal I)2nd-R    | GCGTCGACAGCCTGCGTCTTGTAGT GAG               |
|                         | CDC20.2(Nco II)1st-F   | CATGCCATGGCATGATTGGCTCTACCCCTTTA<br>TAAG    |
|                         | CDC20.2(Spe I)1st-R    | GGACTAGTCCCACCGATTCAAACCTGCATC              |
|                         | CDC20.2(Sal I)2nd-F    | ACGCGTCGACGTATTGGCTCTACCCC<br>TTTATAAG      |
| DMC1::-CDC20 -<br>RNAi  | CDC20.2-(Xba I)2nd-R   | GCTCTAGAGCCACCGATTCAAACCT GCATC             |
|                         | CDC20- (Spe I-Sal I)-F | ACGCACTAGTGGGTCGACGATCAGA<br>TCACCCATTGTGGA |
| DMC1::AUR1 -<br>RNAi    | CDC20-(NcoI-XbaI)-R    | GCCCATGGGCTCTAGAACTCTCTTTCATTCT<br>TGCTC    |
|                         | AUR1II(Nco II)1st-F    | TGGACCATGGATGGCGATCCCTACGGAGAC              |
|                         | AUR1-(Spe I)1st-R      | GACTAGTGTAGCAGCTCGTCTTTTCGCTGA              |
|                         | AUR1-(Xba I)2nd-F      | GCTCTAGAATGGCGATCCCTACGGA GAC               |
| qRT-PCR (AUR1)          | AUR1-((Sal I)2nd-R     | ACGCGTCGACGTAGCAGCTCGTCTTT                  |
|                         | AUR1-F                 | CACCAATTGGATTTGGATCT                        |
|                         | AUR1-R                 | GATAGACGTGACCGAATTTGC                       |
